# Supplementary material
Source: PubMed Central journal article supplement (PMC5892120)
Supplement: JB.00658-17_zjb999094718s1.pdf [file JB.00658-17_zjb999094718s1.pdf]

1  
2  
3  
4  
5  
6  
7  
8  
9  
10  
11  
12  
13  
14  
15  
16  
17  
18  
19  
20  
21  
22  
23

Membrane curvature and the Tol-Pal complex determine polar  
localization of the chemoreceptor Tar in *E. coli*

Terrens N. V. Saaki, Henrik Strahl, Leendert W. Hamoen

**Content:**

|                 |                                                                                    |
|-----------------|------------------------------------------------------------------------------------|
| <b>Table S1</b> | strains used in this study                                                         |
| <b>Table S2</b> | plasmid used in this study                                                         |
| <b>Table S3</b> | primers used in this study                                                         |
| <b>Fig. S1</b>  | Swarming motility assay                                                            |
| <b>Fig. S2</b>  | Tar-mGFP expressed from native promoter and IPTG-inducible promoter                |
| <b>Fig. S3</b>  | Timing of Tar-mGFP midcell localization compared to FtsZ and FtsN                  |
| <b>Fig. S4</b>  | Tar-GFP localization is unrelated to nucleoid position                             |
| <b>Fig. S5</b>  | Timing of Tar-mGFP midcell localization in $\Delta cheA$ compared to FtsZ and FtsN |
| <b>Fig. S6</b>  | Tar-mGFP localization in $\Delta tolA$ and $\Delta pal$ cells                      |
| <b>Fig. S7</b>  | Stability of Tar-mGFP mutants                                                      |
| <b>Fig. S8</b>  | Localization of Tar-mGFP mutants in $\Delta pal$ cells                             |

24 **Supporting Table S1:** *E. coli* strains used in this study. kan: kanamycin, mGFP: monomeric  
 25 green fluorescent protein.

26

| strain   | relevant genotype                                                                                                                                        | reference |
|----------|----------------------------------------------------------------------------------------------------------------------------------------------------------|-----------|
| BW25113  | F-, $\Delta(\text{araD-araB})567$ , $\Delta\text{lacZ4787}>::\text{rrnB-3}$ , $\lambda$ -, <i>rph-1</i> , $\Delta(\text{rhaD-rhaB})568$ , <i>hsdR514</i> | (1)       |
| TSS688   | $\Delta\text{tsr-7028}$ $\Delta(\text{tar-tap})5201$ $\Delta\text{trg-100}$ $\Delta\text{aer-1}$                                                         | (2)       |
| JW0731-1 | BW25113 $\Delta\text{pal-790}>::\text{kan}$                                                                                                              | (1)       |
| JW0729-3 | BW25113 $\Delta\text{tolA788}>::\text{kan}$                                                                                                              | (1)       |
| JW1877-1 | BW25113 $\Delta\text{cheA741}>::\text{kan}$                                                                                                              | (1)       |
| JW1875-5 | BW25113 $\Delta\text{tar-739}>::\text{kan}$                                                                                                              | (1)       |
| TSE24    | JW1875-5 / pTNV148                                                                                                                                       | this work |
| TSE25    | JW1875-5 / pTNV149                                                                                                                                       | this work |
| TSE29    | BW25113 / pTNV149                                                                                                                                        | this work |
| TSE31    | JW0731-1 / pTNV149                                                                                                                                       | this work |
| TSE32    | JW0729-3 / pTNV149                                                                                                                                       | this work |
| TSE38    | JW1877-1 / pTNV149                                                                                                                                       | this work |
| TSE41    | BW25113 / pTNV154                                                                                                                                        | this work |
| TSE42    | BW25113 / pTNV153                                                                                                                                        | this work |
| TSE48    | BW25113 / pTNV155                                                                                                                                        | this work |
| TSE67    | BW25113 / pTNV162                                                                                                                                        | this work |
| TSE68    | JW0731-1 / pTNV153                                                                                                                                       | this work |
| TSE69    | JW0731-1 / pTNV154                                                                                                                                       | this work |
| TSE71    | JW0731-1 / pTNV162                                                                                                                                       | this work |
| TSE79    | TSS688 / pTNV149                                                                                                                                         | this work |
| TSE80    | TSS688 / pTNV153                                                                                                                                         | this work |
| TSE81    | TSS688 / pTNV154                                                                                                                                         | this work |

27 **Supporting Table S2:** Plasmids used in this study. *gfp*: green fluorescent protein, *mgfp*:  
 28 monomeric GFP, *camR*: chloramphenicol acetyltransferase, *ampR*:  $\beta$ -lactamase TEM-1.

| <b>Name</b>     | <b>Relevant feature</b>                                          | <b>reference</b> |
|-----------------|------------------------------------------------------------------|------------------|
| pBAD24-tar-GFP  | pBAD- <i>tar-gfp-ampR</i>                                        | (3)              |
| pBAD24-tar-mGFP | pBAD- <i>tar-mgfp-ampR</i>                                       | this work        |
| p29SEN          | Rep101 pSC101 ori <i>ampR</i>                                    | (4)              |
| pSAV57          | pTrcDown, p15Aori <i>camR</i>                                    | (5)              |
| pTNV100         | <i>amyE3'</i> -spec-PxylR- <i>mgfp-mcs-amyE5'</i> <i>ampR</i>    | this work        |
| pTNV107         | pBAD- <i>tar-mgfp-ampR</i> pSC101 ori <i>araC</i>                | this work        |
| pTNV148         | <i>Ptar-tar-mgfp-ampR</i> -pSC101 ori                            | this work        |
| pTNV149         | <i>Ptrc-tar-mgfp-ampR</i> -pSC101 ori                            | this work        |
| pTNV153         | <i>Ptrc-tar</i> (G248G-D249G-L250G)- <i>mgfp-ampR</i> pSC101 ori | this work        |
| pTNV154         | <i>Ptrc-tar</i> (N379R)- <i>mgfp-ampR</i> pSC101 ori             | this work        |
| pTNV155         | <i>Ptrc-mgfp-ftsN- ampR</i> pSC101                               | this work        |
| pTNV162         | <i>Ptrc-mgfp-glpT-ampR</i> -pSC101                               | this work        |

29

30 **Supporting Table S3:** Primers used in this study.

| name           | sequence                                                                 | description                                                                       |
|----------------|--------------------------------------------------------------------------|-----------------------------------------------------------------------------------|
| TerS327        | CAGGAAGCGGCTCAGGATCCT<br>GAGTAAACTTGGTCTGACAGT                           | Forward primer to linearize pBAD24-tar-mGFP                                       |
| TerS328        | CACCGTCATCACCGAAACGCG<br>CGA                                             | Reverse primer to linearize pBAD24-tar-mGFP                                       |
| TerS362        | GGATCCTGAGCCGCTTCCTGA                                                    | Reverse primer to amplify <i>mgfp</i> from pTNV100                                |
| TerS412        | CGCATGGGGAGACCCCACT<br>ACCA                                              | Reverse sequencing primer for pBAD vectors                                        |
| TerS418        | CATGGTGAATTCCTCCTGCTAG<br>CCCA                                           | Reverse primer to amplify pBAD24 including its RBS and start codon                |
| TerS425        | GCGTTTCGGTGATGACGGTGC<br>GGCGGCACCTCGCTAACGGA<br>GGATCCTGAGCCGCTTCCTGC   | Forward primer to amplify origin of replication of p29SEN (pSC101 Ori)            |
| TerS426        | TTGCGCGCACCGCCCGAACAC<br>CA                                              | Reverse primer to amplify origin of replication of p29SEN (pSC101 Ori)            |
| TerS457        | GCCGCGGTTGAAGCCGCGCGT<br>CGGGT                                           | Forward primer to amplify <i>tar</i> in pTNV149                                   |
| TerS506        | GTGTGAAATTGTTATCCGCTCA<br>CA                                             | Reverse primer to amplify <i>Ptrc</i> down promoter with <i>lacI</i> from pSAV057 |
| TerS507        | GAGCGGATAACAATTTACACA<br>CCCGTTTTTTGGGCTAGCAG<br>GAGGA                   | Forward primer to insert <i>Ptrc</i> -down promoter into pTNV107                  |
| TerS508        | CGGCTTGACGGAGTAGCATAG<br>GGT                                             | Forward primer to insert <i>tar</i> native promoter into pTNV107                  |
| TerS509        | TATGCTACTCCGTCAAGCCGG<br>GCGCTGTTAGATAGCGCGGCG<br>TCAGAAGTGGCGTAA        | Reverse primer to insert <i>tar</i> native promoter into pTNV107                  |
| TerS510        | GCCGCCTGGGCGCTGCGACT<br>GGCA                                             | Reverse primer to amplify inside <i>tar</i>                                       |
| TerS515        | CGCAGTGAAATGGGC <b>GGAGGA</b><br><sup>1</sup> GCGCAGAGCGT                | Forward primer to design Tar(G248G D249G L250G) in pTNV149                        |
| TerS516        | CTGCGC <b>ICCTCC</b> <sup>1</sup> GCCCATTTC<br>ACTGCGCCCGTCA             | Reverse primer to design Tar(G248G D249G L250G) in pTNV149                        |
| TerS517        | CGCGCGGCTTCAACCGCGGCT<br><b>CT</b> <sup>1</sup> CAGCGCGAGGATATTAGTC<br>T | Mutagenesis primer to introduce N379R in Tar in pTNV149                           |
| TerS520        | CCGGGCAGGCCATGTCTGCCA<br>GCGGCCGCGACTCTAGAATTC<br>G                      | Forward primer to linearize pTNV149                                               |
| TerS521        | CTAGCAGGAGGAATTCACCAT<br>GAGCAAAGGAGAAGAACTTTT<br>CACT                   | Forward primer to amplify <i>mgfp</i> from pTNV100                                |
| TerS523        | GGCAGACATGGCCTGCCCGG<br>GGGGGGGATTTTGAGGGTTTC<br>A                       | Reverse primer to amplify <i>ftsN</i> to design Pspac-msfGFP-4GS-FtsN             |
| TerS541        | CAGGAAGCGGCTCAGGATCCG<br>CACAAAGGAGATTATGTACGCC<br>GCA                   | Forward primer to create Pspac-msfGFP-4GS-FtsN                                    |
| TerS544        | GGCAGACATGGCCTGCCCGG<br>GCCATTAGCCTCCGTTGCGTT<br>CTTGCA                  | Reverse primer to amplify <i>glpT</i>                                             |
| TerS545        | CAGGAAGCGGCTCAGGATCCA<br>TGTTGAGTATTTTTAAACCAGC<br>GCCA                  | Forward primer to amplify <i>glpT</i>                                             |
| GFP(A206K)-for | CCTGTGACACAATCT <b>AA</b> ACTT<br>TCGAAAGATCCC                           | Forward primer to introduce A206K in GFP in pBAD24-tar-GFP                        |
| GFP(A206K)-rev | GGGATCTTTTCGAAAG <b>TTT</b> AGAT<br>TGTGTCGACAGG                         | Reverse primer to introduce A206K in GFP in pBAD24-tar-GFP                        |

31

32 1: In red codons used to introduce mutations in amino acid sequences.

33 **Fig. S1**

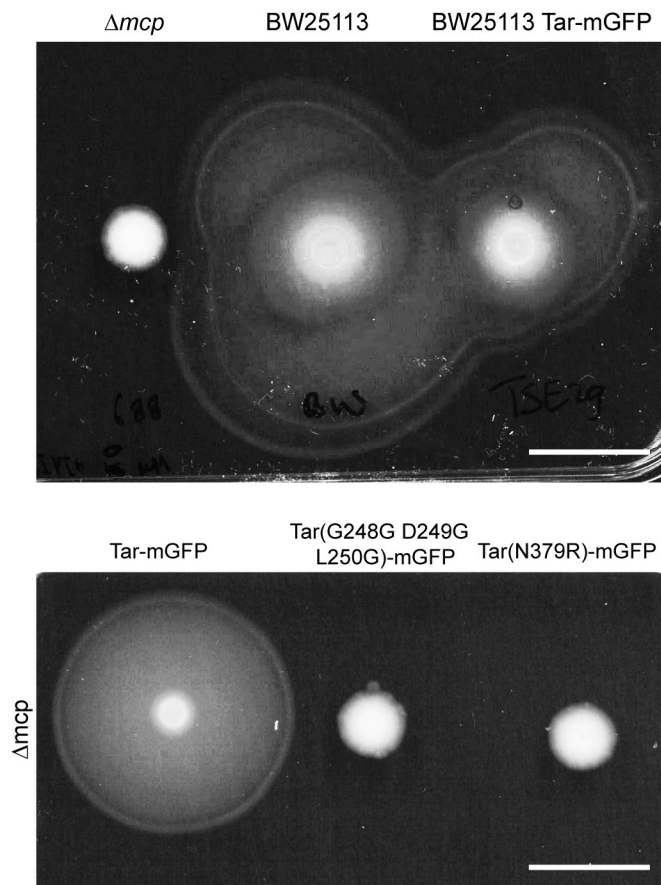

34

35

36 **Fig. S1. Swarming motility assay**

37 Swarming motility assay to test functionality of Tar-mGFP fusions. Representative image of  
38 colonies of *E. coli*  $\Delta mcp$ , *E. coli* BW25113, *E. coli* BW25113 + Tar-mGFP, *E. coli*  $\Delta mcp$  + Tar-  
39 mGFP, *E. coli*  $\Delta mcp$  + Tar(G488G D249G L250G)-mGFP and *E. coli*  $\Delta mcp$  Tar(N379R)-  
40 mGFP after 18 hours of growth at 30 °C on swarming motility agar. Fusion proteins were  
41 induced with 15  $\mu$ M IPTG. Scale bars are 2 cm. Strain used are TSS668, BW25113, TSE29,  
42 TSE79, TSE80, and TSE81.

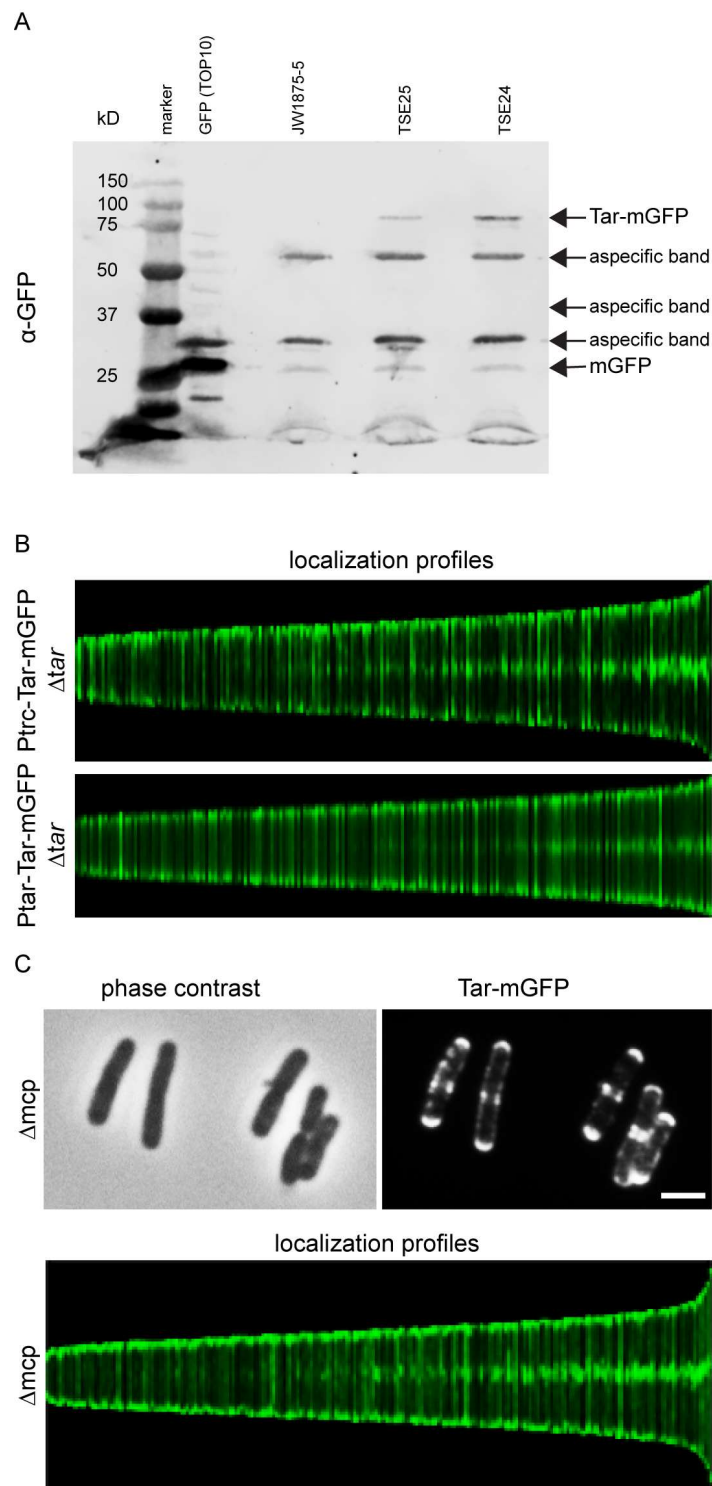

44

45 **Fig. S2. Tar-mGFP expressed from native promoter and IPTG-inducible promoter.**

46 (A) Westernblot using anti-GFP serum of cell extracts from cells constitutively expressing GFP  
 47 (*E. coli* TOP 10 / pTNV100),  $\Delta tar$  cells (JW1875-5), and cells expressing Tar-mGFP (TSE25  
 48 and TSE24). Tar-mGFP was expressed from the native promoter of *tar* (strain TSE25) or from

49 the IPTG-inducible (15  $\mu$ M IPTG) *P<sub>trc</sub>* promoter (strain TSE24). The expected size for the  
50 fusion proteins is 87 kDa. Expression from the pBAD promoter is approximately 2x that of the  
51 native promoter. (B) Comparison of Tar-mGFP localization when expressed from the *P<sub>trc</sub>*  
52 promoter (upper panel) or native promoter (lower panel). 4630 and 4111 cells were used to  
53 construct the localization profiles, respectively. (C) Phase contrast and fluorescence  
54 microscopy images and localization profile of Tar-mGFP expressed in a  $\Delta$ *mcp* mutant lacking  
55 all chemoreceptors (strain TSE79). 2089 cells were used to construct the localization profile.  
56 Scale bar is 2  $\mu$ m.

57 **Fig.S3**

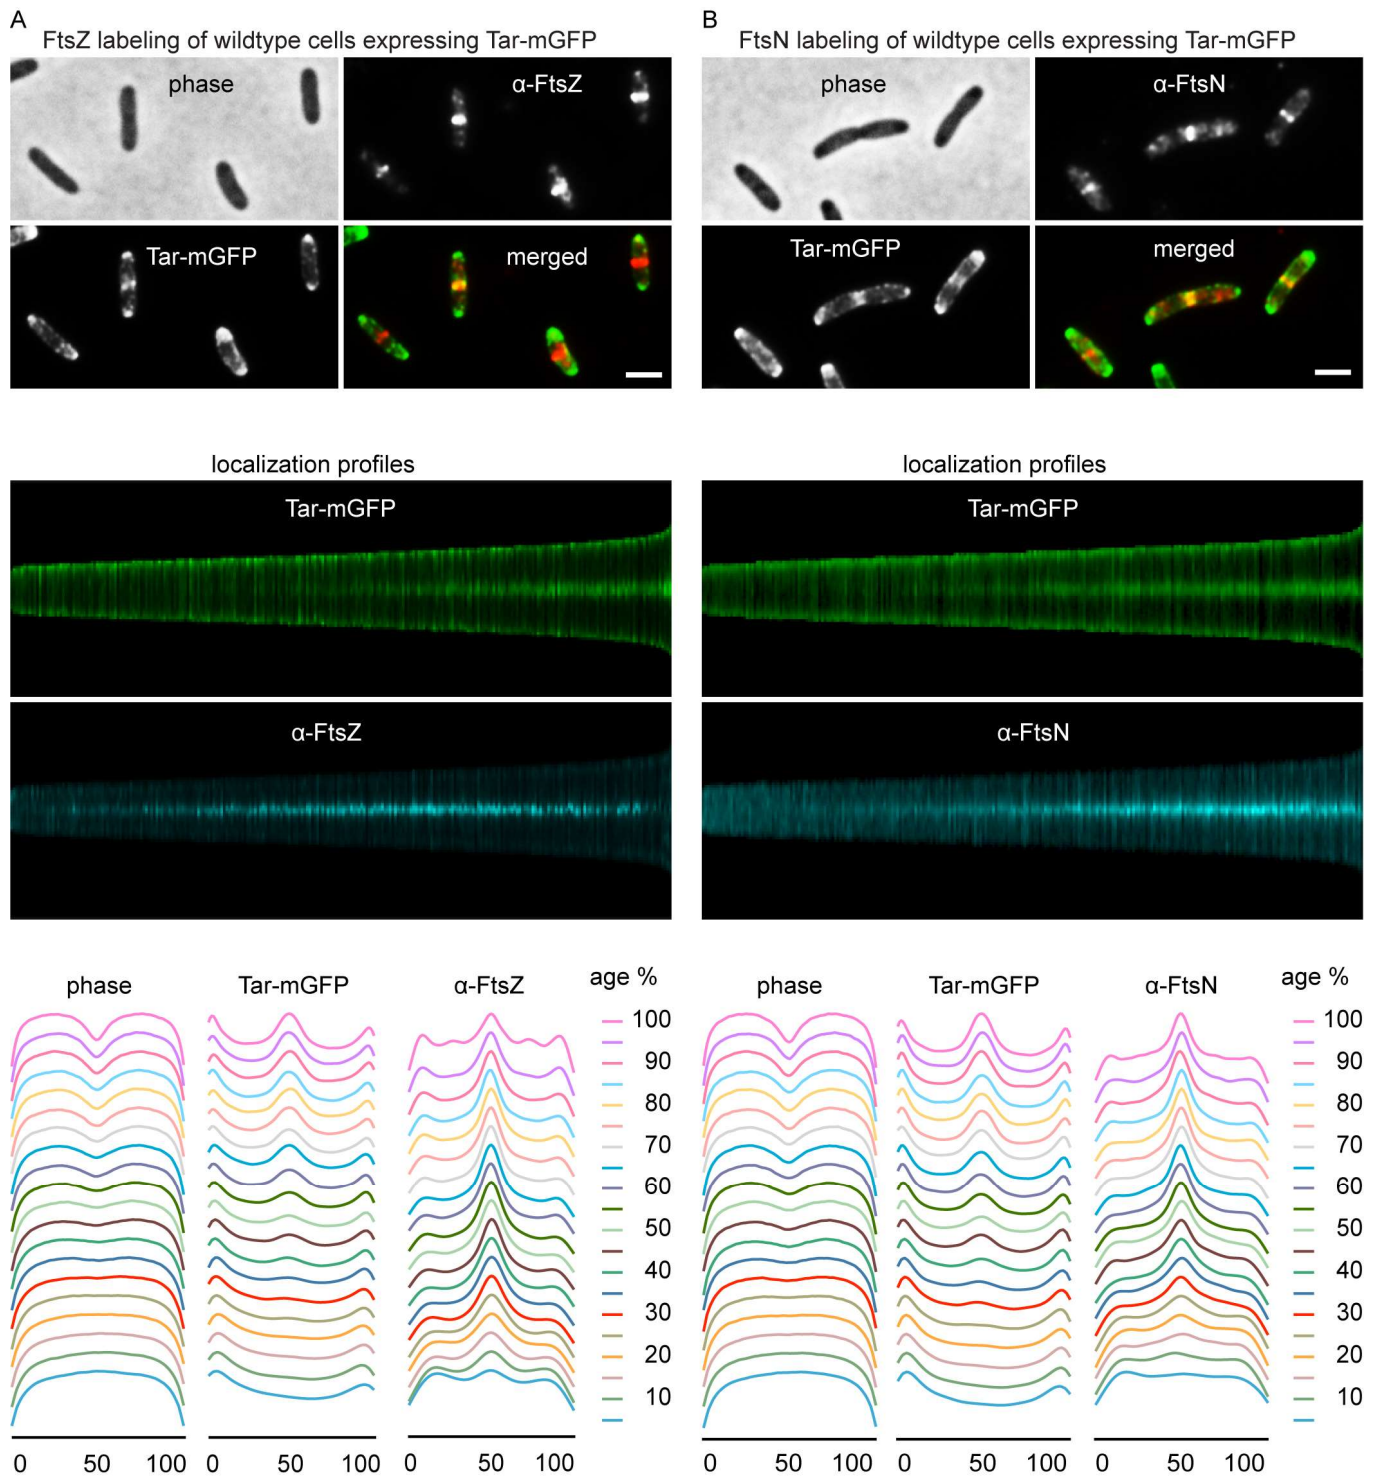

58

59 **Fig. S3. Timing of Tar-mGFP midcell localization compared to FtsZ and FtsN.** Tar-mGFP  
 60 expressing cells were fixed and immune-labelled using FtsZ (A) and FtsN (B) antiserum. Top  
 61 panel: fluorescence light microscopy images, middle panel: fluorescence localization profiles,



62 lower panel: graphical presentation of constriction (phase) and fluorescence signals during  
63 the cell cycle calculated from the localization profiles. Cell age refers to age classes divided  
64 in 5% (cell cycle) bins. 4816 and 3639 cells were used for FtsZ and FtsN labeling, respectively.  
65 Scale bars are 2  $\mu\text{m}$  and the strain used is TSE29.

66 **Fig. S4**

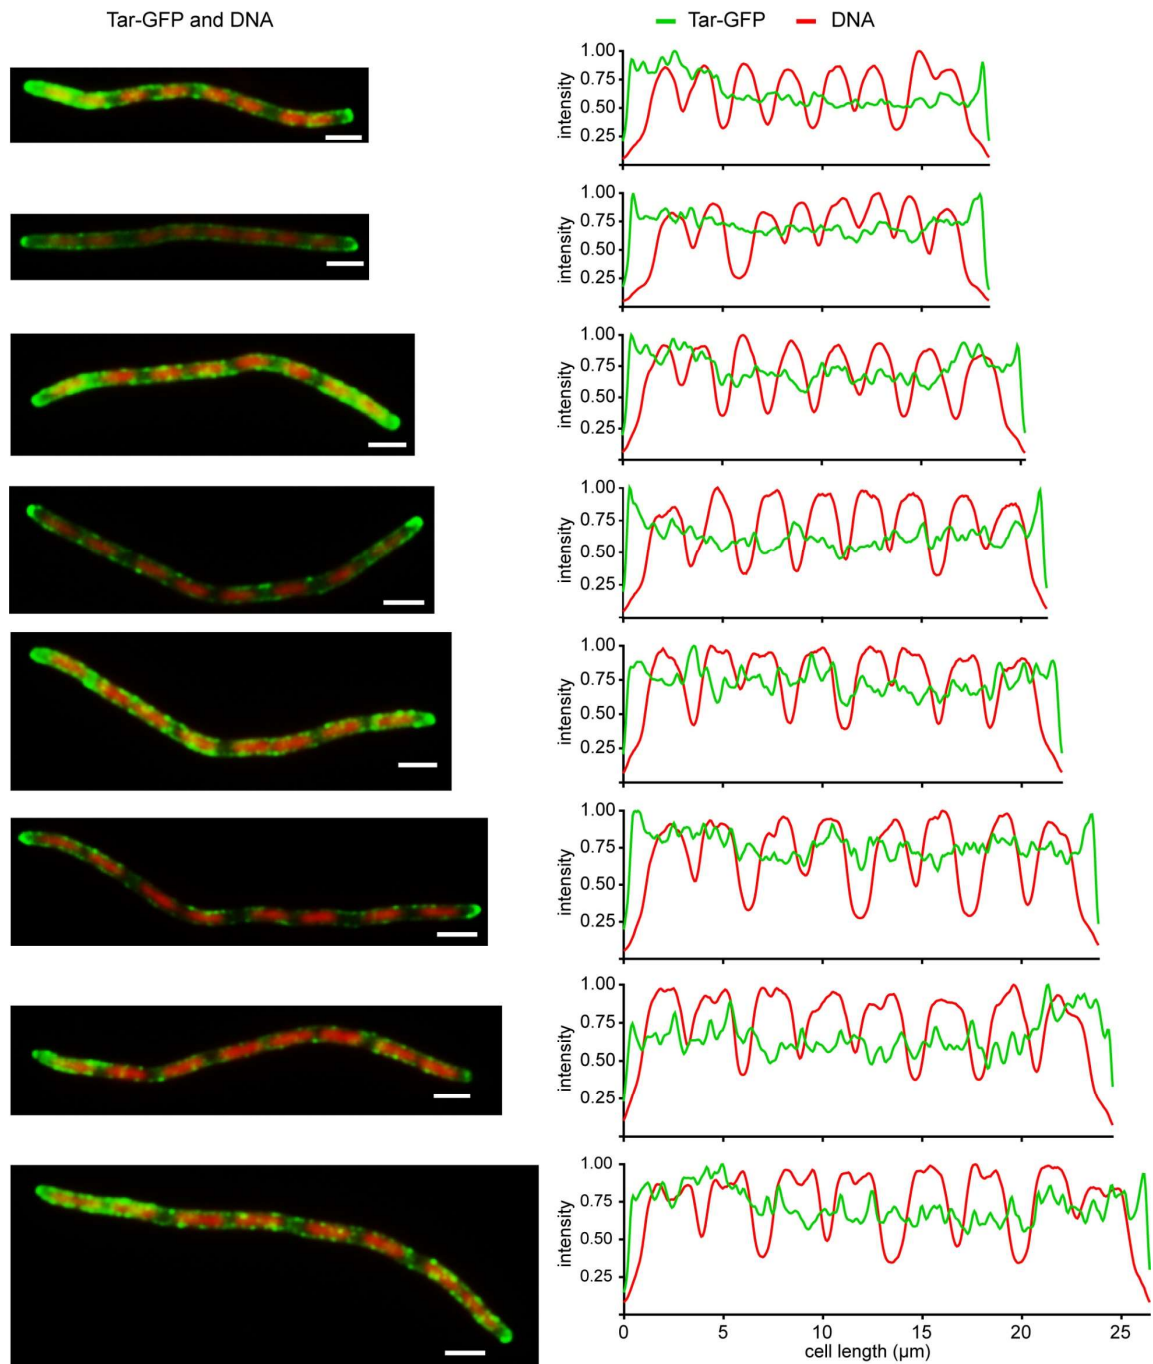

67

68 **Fig. S4. Tar-GFP localization is unrelated to nucleoid position**

69 Fluorescence microscopy images of cephalalexin treated (4 h) cells expressing Tar-mGFP and  
70 stained with DAPI. Line scans of the GFP and DAPI signals are shown in the right panels.  
71 These images are more examples of cells shown in Fig. 2B in the main text. Scale bars are 2  
72  $\mu\text{m}$ . Strain used is TSE29.

73 **Fig.S5**

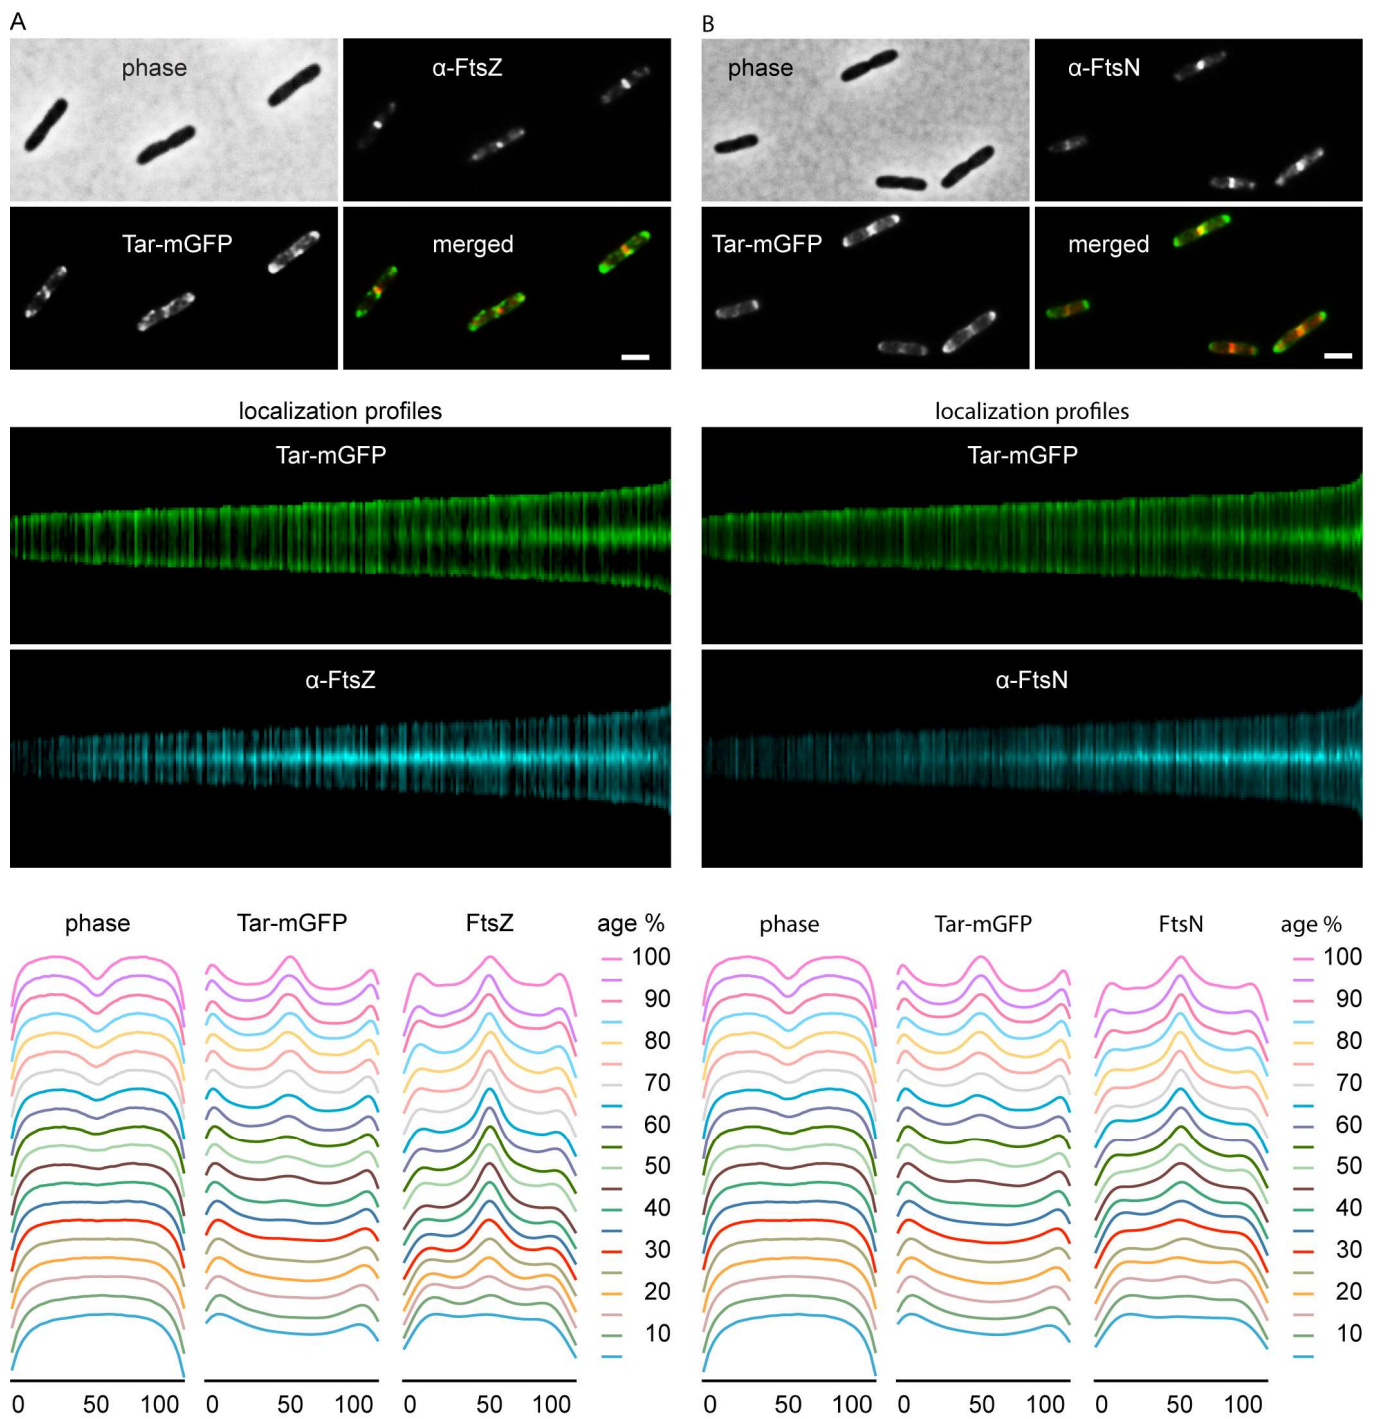

74

75

76 **Fig. S5. Timing of Tar-mGFP midcell localization in  $\Delta cheA$  compared to FtsZ and FtsN.**

77 Tar-mGFP expressing  $\Delta cheA$  cells were fixed and immune-labelled using FtsZ (A) and FtsN

78 (B) antiserum. Top panel: fluorescence light microscopy images, middle panel: fluorescence

79 localization profiles, lower panel: graphical presentation of constriction (phase) and

80 fluorescence signals during the cell cycle calculated from the localization profiles. Cell age  
81 refers to age classes divided in 5% (cell cycle) bins. 2504 and 3187 cells were used for FtsZ  
82 and FtsN labeling, respectively. Scale bars are 2  $\mu\text{m}$  and the strain used is TSE38.

83

84 **Fig. S6**

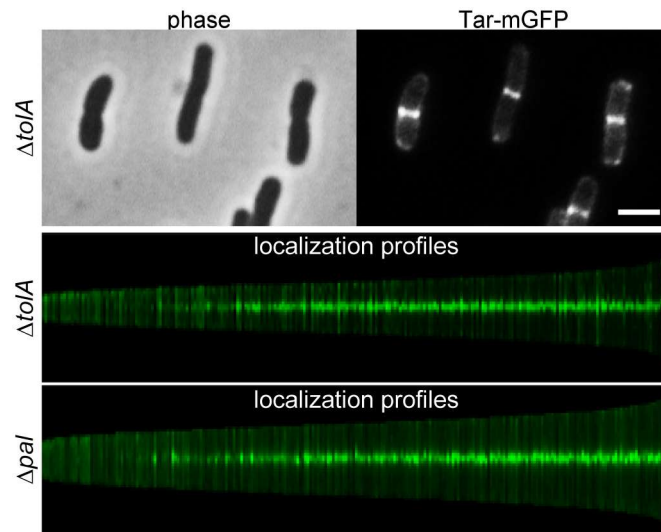

85

86 **Fig S6. Tar-mGFP localization in  $\Delta tolA$  and  $\Delta pal$  cells**

87 Fluorescence microscopy image and localization profiles of Tar-mGFP expressed in a  $\Delta tolA$   
88 and  $\Delta pal$  background. 4506 and 9044 cells were used to construct the localization profile for  
89  $\Delta tolA$  and  $\Delta pal$ , respectively. The localization profile for  $\Delta pal$  is the same as in Fig. 3B. Scale  
90 bar is 2  $\mu$ m. The strains used are TSE31 and TSE32.

91 **Fig. S7**

92

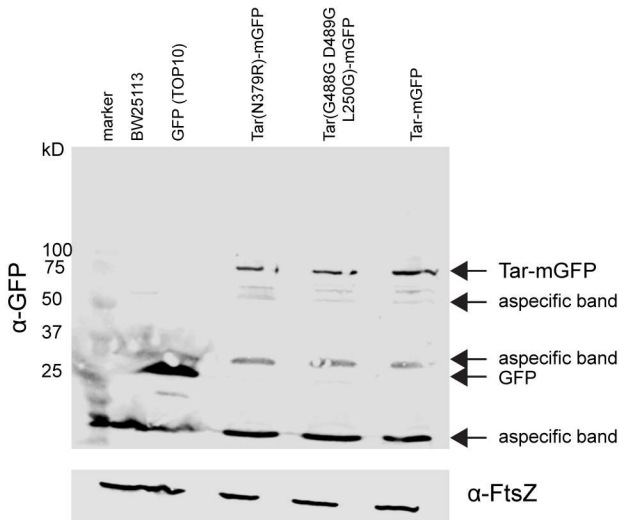

93

94

95 **Fig. S7. Stability of Tar-mGFP mutants**

96 Western blot analysis of Tar-mGFP mutants expressed in *E. coli*. The expected size for the  
97 fusion proteins is 87 kDa. Strains used are BW25113 (wild type), *E. coli* TOP10/pTNV100  
98 (GFP) TSE29 (Tar-mGFP), TSE41 (Tar(G248G D249G L250G)-mGFP), and TSE42  
99 (Tar(N379R)-mGFP).

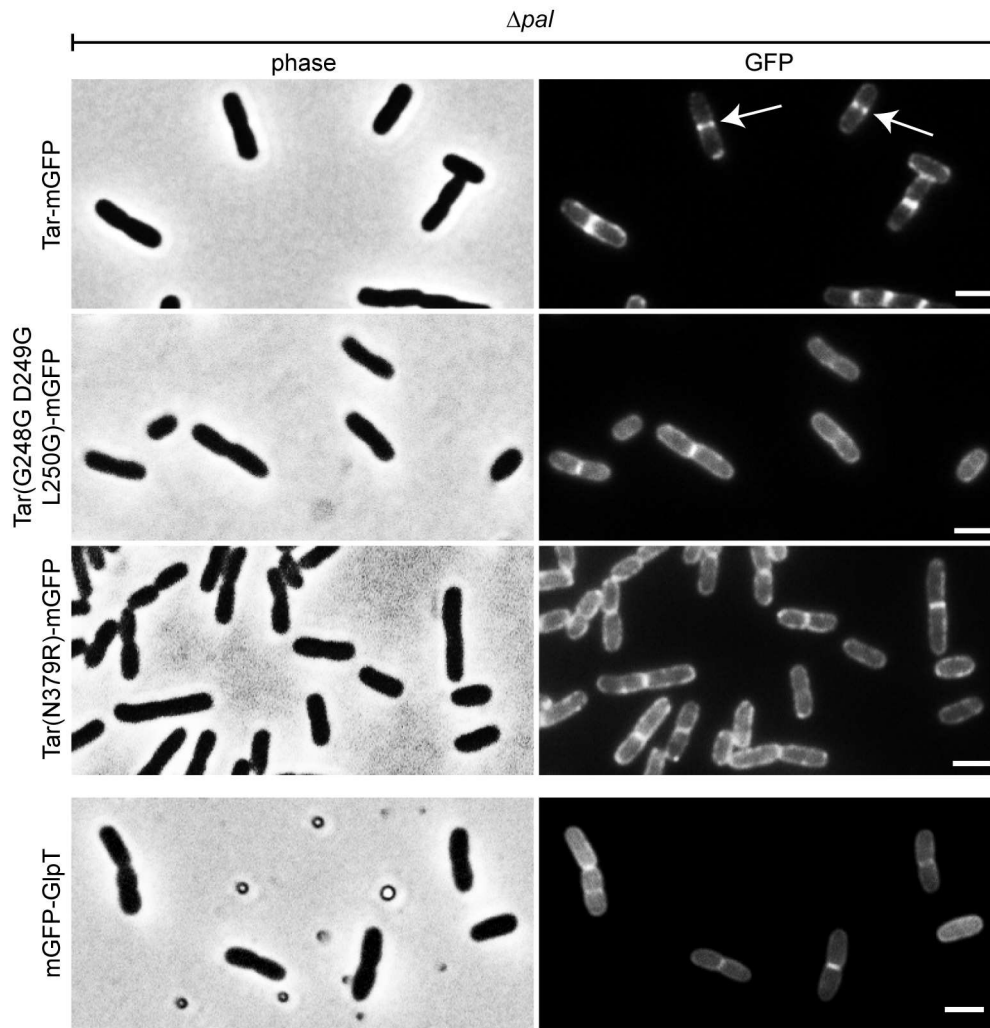

101

102 **Fig. S8 Localization of Tar-mGFP mutants in  $\Delta pal$  cells**

103 Phase contrast and fluorescence images of  $\Delta pal$  cells expressing Tar-mGFP, Tar-(G248G  
 104 D249G L250G)-mGFP, Tar-(N379R)-mGFP and mGFP-GlpT. Wild type Tar-mGFP  
 105 accumulates as two dots (white arrows) in ~47% of cells, while this accumulation was neither  
 106 observed for the Tar-mGFP mutants proteins nor for the inner membrane marker mGFP-GlpT.  
 107 Strain used are TSE31, TSE68, TSE69, and TSE71. The scale bars are 2  $\mu$ m.

108

109 **References**

- 110 1. **Baba T, Ara T, Hasegawa M, Takai Y, Okumura Y, Baba M, Datsenko KA, Tomita M,**  
111 **Wanner BL, Mori H.** 2006. Construction of *Escherichia coli* K-12 in-frame, single-gene  
112 knockout mutants: the Keio collection. *Molecular Systems Biology* **2**:2006.0008.
- 113 2. **Ames P, Studdert CA, Reiser RH, Parkinson JS.** 2002. Collaborative signaling by  
114 mixed chemoreceptor teams in *Escherichia coli*. *Proc Natl Acad Sci USA* **99**:7060–7065.
- 115 3. **Shiomi D, Yoshimoto M, Homma M, Kawagishi I.** 2006. Helical distribution of the  
116 bacterial chemoreceptor via colocalization with the Sec protein translocation machinery.  
117 *Mol Microbiol*, 2<sup>nd</sup> ed. **60**:894–906.
- 118 4. **Genevaux P, Keppel F, Schwager F, Langendijk-Genevaux PS, Hartl FU,**  
119 **Georgopoulos C.** 2004. In vivo analysis of the overlapping functions of DnaK and trigger  
120 factor. *EMBO Rep* **5**:195–200.
- 121 5. **Alexeeva S, Gadella TWJ, Verheul J, Verhoeven GS, Blaauwen den T.** 2010. Direct  
122 interactions of early and late assembling division proteins in *Escherichia coli* cells  
123 resolved by FRET. *Mol Microbiol* **77**:384–398.

124
